# Supplementary material for: On the climatic influence of CO 2 forcing in the Pliocene
Source: Copernicus journal article supplement (doi:10.5194/cp-2022-90), 2022-12-02
Supplement: Supplementary file 1 [file cp-2022-90-supplement.zip]

# Supplementary of ‘On the climatic influence of CO<sub>2</sub> forcing in the Pliocene’

## S1. Linearity check

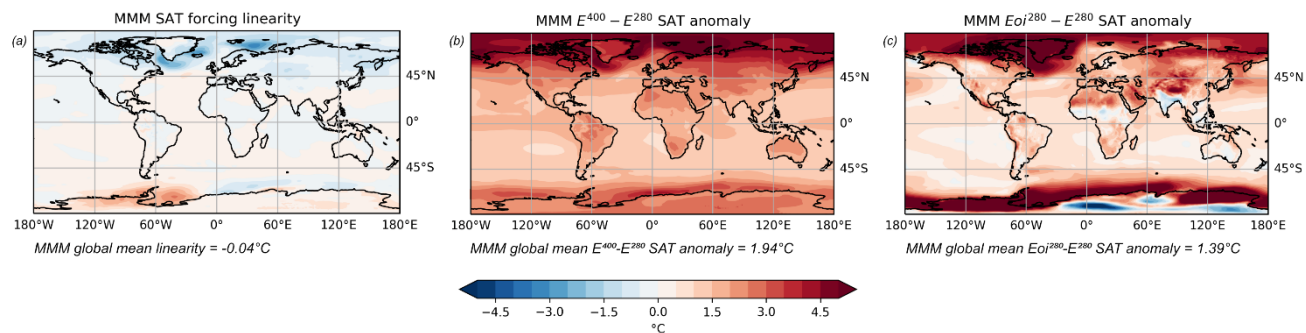

5 **Figure S1: MMM (CCSM4-UoT, COSMOS, HadCM3 and MIROC4m) linearity check (a), compared to the equivalent MMM  $E^{400} - E^{280}$  (b) and  $Eoi^{280} - E^{280}$  (c) SAT anomalies. The regions of higher non-linearity in the Nordic Seas and off Greenland are strongly influenced by CCSM4-UoT, and the region of non-linearity in western Antarctica is strongly influenced by CCSM4-UoT and COSMOS.**

10 S2. FCO<sub>2</sub> on surface air temperature in individual models

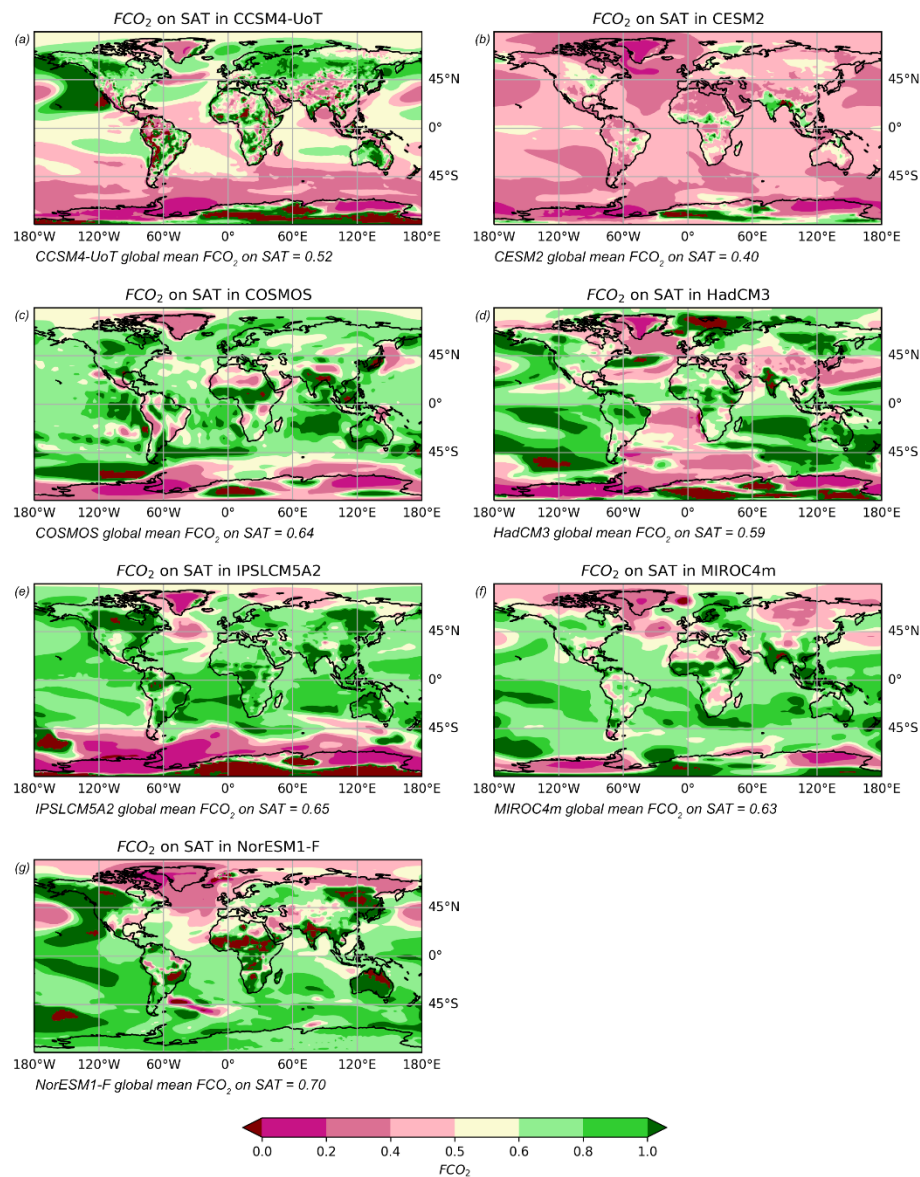

Figure S2: FCO<sub>2</sub> on surface air temperature (SAT) in individual models.

S3. FCO<sub>2</sub> on sea surface temperature in individual models

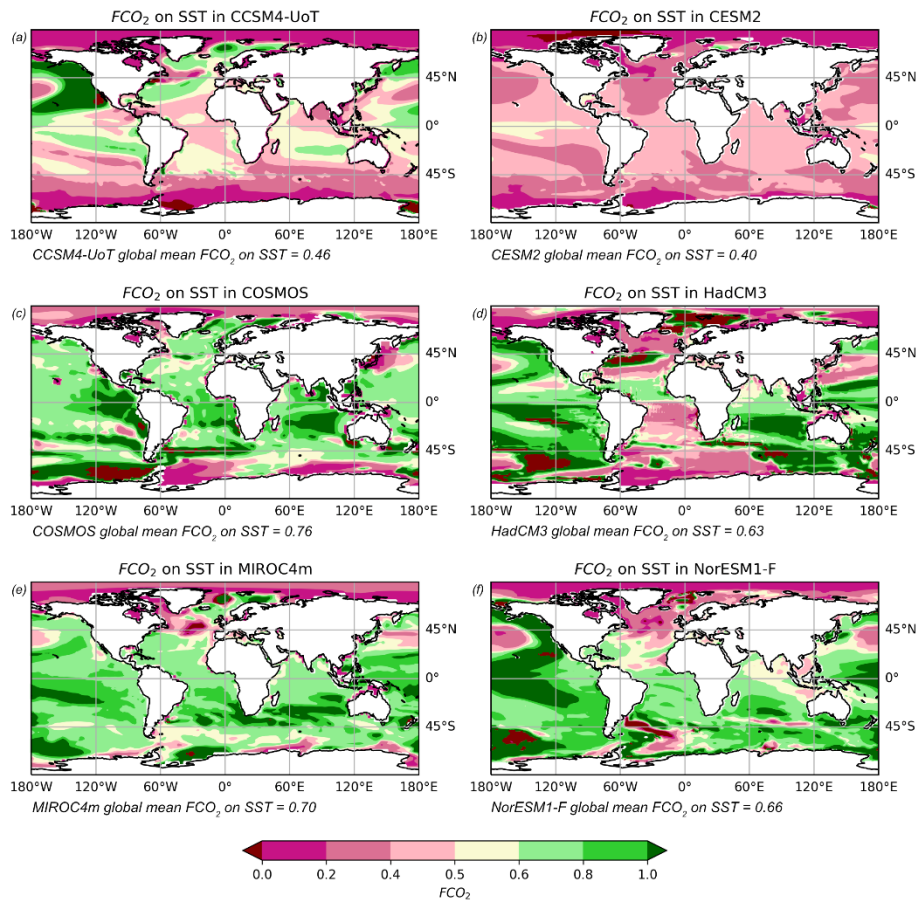

15 **Figure S3: FCO<sub>2</sub> on sea surface temperature (SST) in individual models. IPSLCM5A2 is excluded due to limited data availability.**

## S4. FCO<sub>2</sub> on precipitation in individual models

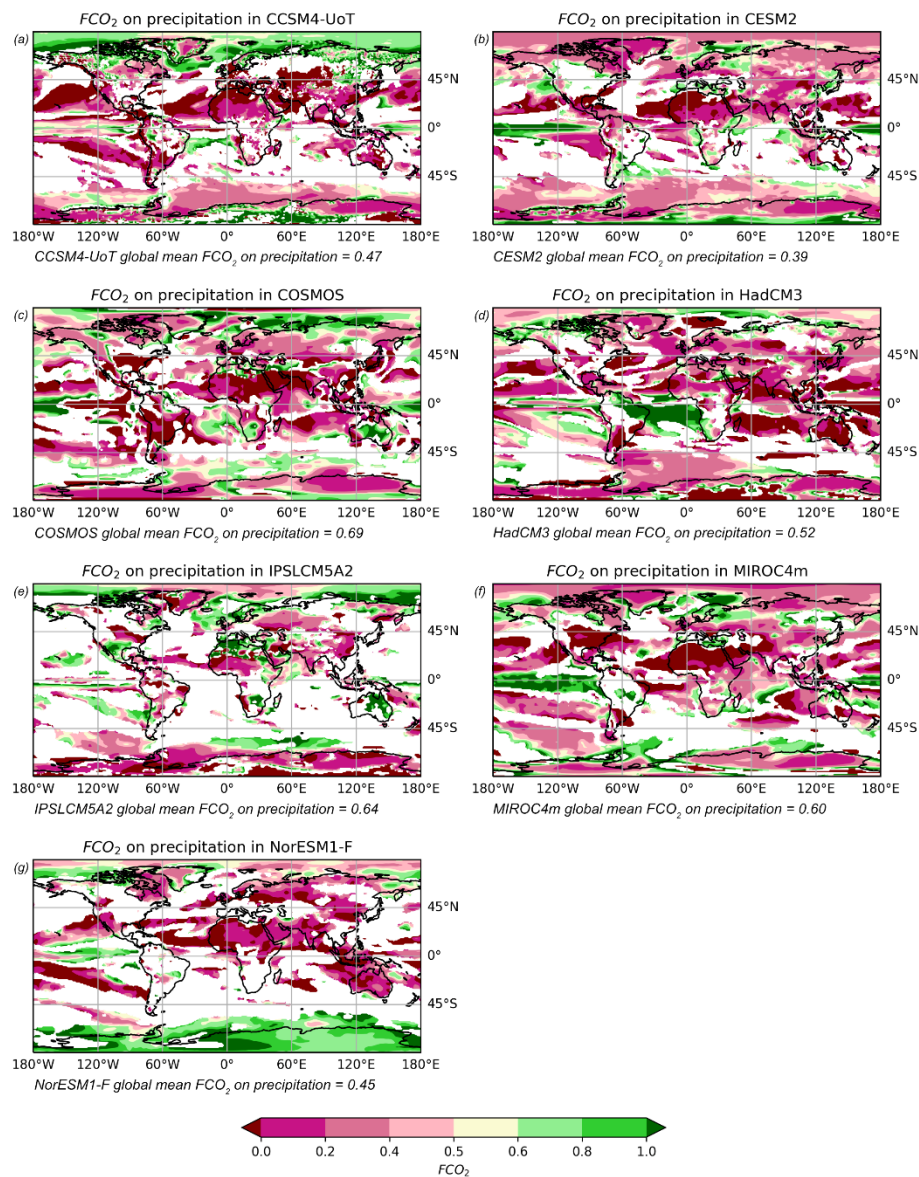

**Figure S4: FCO<sub>2</sub> on precipitation in individual models. Regions of Eoi<sup>400</sup>-E<sup>280</sup> precipitation change less than 10% are masked (white).**
